# Supplementary material
Source: MDPI journal article supplement (https://www.mdpi.com/2073-4395/10/9/1285)
Supplement: s1 [file agronomy-908405-supplementary.xlsx]

## Sheet: LR
Table S1: The list of protein- and RNA-coding genes in 500 kb upstream and 500 kb downstream from the most significant SNP of the QTL. Genes and proteins overlapping with the peak SNP are highlighted in bold.
QTL	Peak marker	#	Genes	Protein of T. aestivum	Protein of orthologue	% genes of T. aestivum matching the sequence of orthologue
QLr.ipbb-1A.2	Excalibur_c1936_1072	1	TraesCS1A02G400100	Uncharacterized protein	-	-
		2	TraesCS1A02G400200	Urease accessory protein G	-	-
		3	TraesCS1A02G400300	SAC domain-containing protein	-	-
		4	TraesCS1A02G400400	PPM-type phosphatase domain-containing protein	-	-
		5	TraesCS1A02G400500	Uncharacterized protein	NAD_binding_11 domain-containing protein (A. tauschii)	95.64
		6	TraesCS1A02G400600	Uncharacterized protein	NAD_binding_11 domain-containing protein (A. tauschii)	96.23
		7	TraesCS1A02G400700	Uncharacterized protein	Uncharacterized protein (H. vulgare)	77.93
		8	TraesCS1A02G400800	Uncharacterized protein	F-box domain-containing protein (T. urartu)	98.42
		9	TraesCS1A02G400900	F-box domain-containing protein	-	-
		10	TraesCS1A02G401000	Uncharacterized protein	Uncharacterized protein (T. turgidum)	99.78
		11	TraesCS1A02G401100	Uncharacterized protein	Uncharacterized protein (A. tauschii)	77.11
		12	TraesCS1A02G401200	DUF4220 domain-containing protein	-	-
		13	TraesCS1A02G401300	DUF4220 domain-containing protein	-	-
		14	TraesCS1A02G401400	DUF4220 domain-containing protein	-	-
		15	TraesCS1A02G401500	Uncharacterized protein	-	< 70%
		16	TraesCS1A02G401600	Uncharacterized protein	Uncharacterized protein (T. urartu)	95.24
		17	TraesCS1A02G401700	Uncharacterized protein	Uncharacterized protein (T. urartu)	95.24
QLr.ipbb-1B.4	BS00050522_51	1	TraesCS1B02G000600	Uncharacterized protein	Uncharacterized protein (A. tauschii)	86.47
		2	TraesCS1B02G000700	Uncharacterized protein	Uncharacterized protein (T. turgidum)	100
		3	TraesCS1B02G000800	Pex14_N domain-containing protein	-	-
		4	TraesCS1B02G000900	RING-type domain-containing protein	-	-
		5	TraesCS1B02G001000	Uncharacterized protein	Uncharacterized protein (A. tauschii)	93.66
		6	TraesCS1B02G001100	Uncharacterized protein	Uncharacterized protein (T. urartu)	98.43
		7	TraesCS1B02G001200	Uncharacterized protein	Uncharacterized protein (A. tauschii)	70.06
		8	TraesCS1B02G001400	Uncharacterized protein	Uncharacterized protein (A. tauschii)	75.44
		9	TraesCS1B02G001500	Protein kinase domain-containing protein	-	-
		10	TraesCS1B02G001600	Uncharacterized protein	Uncharacterized protein (A. tauschii)	82.39
		11	TraesCS1B02G001700	Uncharacterized protein	Secologanin synthase (A. tauschii)	94.37
		12	TraesCS1B02G001800	Phospholipid-transporting ATPase	-	-
		13	TraesCS1B02G001900	Uncharacterized protein	Uncharacterized protein (T. dicoccoides)	98.87
		14	TraesCS1B02G002000	HDAC_interact domain-containing protein	-	-
		15	TraesCS1B02G002100	Uncharacterized protein	Glycosyltransferase family 92 protein (A. tauschii)	89.39
		16	TraesCS1B02G002200	Uncharacterized protein	-	< 70 %
		17	TraesCS1B02G002300	NB-ARC domain-containing protein	-	-
		18	TraesCS1B02G002400	Uncharacterized protein	-	< 70 %
		19	TraesCS1B02G002500	Uncharacterized protein	Uncharacterized protein (B. distachyon)	87.85
		20	TraesCS1B02G002600	Uncharacterized protein	-	< 70 %
		21	TraesCS1B02G002700	LRRNT_2 domain-containing protein	-	-
		22	TraesCS1B02G002800	Leaf rust resistance Lr21 / NRC1a	-	-
QLr.ipbb-3A.2	BS00057445_51	1	TraesCS3A02G046900	Uncharacterized protein	Uncharacterized protein (A. tauschii)	93.63
		2	TraesCS3A02G047000	Peptidase A1 domain-containing protein	-	-
		3	TraesCS3A02G047100	Peptidase A1 domain-containing protein	-	-
		4	TraesCS3A02G047200	Uncharacterized protein	Protein ABCI7, chloroplastic (A. tauschii)	92.83
		5	TraesCS3A02G047300	Uncharacterized protein	-	< 70 %
		6	TraesCS3A02G047400	Uncharacterized protein	-	< 70 %
		7	TraesCS3A02G047500	Uncharacterized protein	Spore coat protein A (A. tauschii)	90.67
		8	TraesCS3A02G047600	Uncharacterized protein	Uncharacterized protein (H. vulgare)	78.89
		9	TraesCS3A02G047700	UBIQUITIN_CONJUGAT_2 domain-containing protein	-	-
		10	TraesCS3A02G047800	WD_REPEATS_REGION domain-containing protein	-	-
		11	TraesCS3A02G047900	4HBT domain-containing protein	-	-
		12	TraesCS3A02G048000	HMA domain-containing protein	-	-
		13	TraesCS3A02G048200	Uncharacterized protein	UDP-glycosyltransferase 72B3 (T. urartu)	97.62
		14	TraesCS3A02G048300	E3 ubiquitin-protein ligase	-	-
		15	ENSRNA050008150	tRNA-Met	-	-
		16	ENSRNA050008152	tRNA-Ala	-	-
		17	ENSRNA050008154	tRNA-Ala	-	-
QLr.ipbb-4A.2	RAC875_c20429_903	1	TraesCS4A02G334500	Uncharacterized protein	Sucrose transport protein SUC3 (A. tauschii)	94.96
		2	TraesCS4A02G334600	Uncharacterized protein		< 70 %
		3	TraesCS4A02G334700	Actin-related protein 2/3 complex subunit 4	-	-
		4	TraesCS4A02G334800	Uncharacterized protein	Uncharacterized protein (A. tauschii)	98.61
		5	TraesCS4A02G334900	Uncharacterized protein	-	< 70 %
		6	TraesCS4A02G335000	Uncharacterized protein	-	< 70 %
		7	TraesCS4A02G335200	Uncharacterized protein	Wall-associated receptor kinase 5 (A. tauschii)	77.73
		8	TraesCS4A02G335300	AvrRpt-cleavage domain-containing protein	-	-
		9	TraesCS4A02G335400	Uncharacterized protein	Putative oligomeric Golgi complex subunit 2 (A. tauschii)	81.23
		10	TraesCS4A02G335500	Uncharacterized protein	-	< 70 %
		11	TraesCS4A02G335600	NB-ARC domain-containing protein	-	-
		12	TraesCS4A02G335700	Protein kinase domain-containing protein	-	-
		13	TraesCS4A02G335800	Uncharacterized protein	-	< 70 %
		14	TraesCS4A02G335900	Uncharacterized protein	Uncharacterized protein (B. distachyon)	79.93
		15	TraesCS4A02G336000	Uncharacterized protein	Uncharacterized protein (B. distachyon)	70.39
QLr.ipbb-4D.1	IAAV6015	1	TraesCS4D02G219400	Uncharacterized protein	Uncharacterized protein (A. tauschii)	92.22
		2	TraesCS4D02G219500	Uncharacterized protein	Uncharacterized protein (A. tauschii)	100
		3	TraesCS4D02G219600	Uncharacterized protein	Uncharacterized protein (T. turgidum)	91.94
		4	TraesCS4D02G219700	Expansin	-	-
		5	TraesCS4D02G219800	Uncharacterized protein	Uncharacterized protein (A. tauschii)	100
		6	TraesCS4D02G219900	Uncharacterized protein	Uncharacterized protein (A. tauschii)	100
		7	TraesCS4D02G220000	Uncharacterized protein	Uncharacterized protein (A. tauschii)	100
		8	TraesCS4D02G220100	Uncharacterized protein	Rho GTPase-activating protein 24 (A. tauschii)	99.88
		9	TraesCS4D02G220200	Imidazole glycerol phosphate synthase hisHF	-	-
		10	TraesCS4D02G220300	Uncharacterized protein	Uncharacterized protein (T. turgidum)	88.89
		11	TraesCS4D02G220400	PGG domain-containing protein	-	-
QLr.ipbb-5B.2	tplb0027f13_1493	1	TraesCS5B02G368000	Nontranslating CDS	-	-
		2	TraesCS5B02G368100	Uncharacterized protein	-	-
		3	TraesCS5B02G368137	Nontranslating CDS	-	-
		4	TraesCS5B02G368300	Uncharacterized protein	Fruit bromelain (A. tauschii)	95.63
		5	TraesCS5B02G368400	Uncharacterized protein	-	-
		6	TraesCS5B02G368500	Potassium transporter	-	-
		7	TraesCS5B02G368600	S-acyltransferase	-	-
		8	TraesCS5B02G368700	Uncharacterized protein	-	-
		9	TraesCS5B02G368800	Uncharacterized protein	Solute carrier family 12 member 7 (A. tauschii)	96.9
QLr.ipbb-6A.4	BS00091666_51	1	TraesCS6A02G058400	Uncharacterized protein	Cytochrome P450 76C2 (A. tauschii)	93.48
		2	TraesCS6A02G058500	Protein kinase domain-containing protein	-	-
		3	TraesCS6A02G058600	LRRNT_2 domain-containing protein	-	-
		4	TraesCS6A02G058700	Uncharacterized protein	Uncharacterized protein (A. tauschii)	98.04
		5	TraesCS6A02G058800	Uncharacterized protein	Uncharacterized protein (T. urartu)	89.81
		6	TraesCS6A02G058900	F-box domain-containing protein	-	-
		7	TraesCS6A02G059000	Histone H4 variant TH011	-	-
		8	TraesCS6A02G059100	t-SNARE coiled-coil homology domain-containing protein	-	-
		9	TraesCS6A02G059200	Peptidase_M14 domain-containing protein	-	-
		10	TraesCS6A02G059300	Uncharacterized protein	Uncharacterized protein (B. distachyon)	76.13
		11	TraesCS6A02G059400	Uncharacterized protein	Uncharacterized protein (H. vulgare)	94.02
		12	TraesCS6A02G059500	Uncharacterized protein	Uncharacterized protein (B. distachyon)	93.93
		13	TraesCS6A02G059600	Uncharacterized protein	GST C-terminal domain-containing protein (T. urartu)	98.63
		14	TraesCS6A02G059700	Uncharacterized protein	Uncharacterized protein (H. vulgare)	87.58
		15	TraesCS6A02G059800	Uncharacterized protein	Dehydrin DHN3 (A. tauschii)	92.16
		16	TraesCS6A02G059900	Uncharacterized protein	Uncharacterized protein (A. tauschii)	96.79
		17	TraesCS6A02G060000	Uncharacterized protein	-	< 70 %
		18	TraesCS6A02G060100	Uncharacterized protein	Uncharacterized protein (T. turgidum)	100
		19	TraesCS6A02G060200	Uncharacterized protein	Uncharacterized protein (A. tauschii)	82.74
		20	TraesCS6A02G060300	OTU domain-containing protein	-	-
		21	TraesCS6A02G060400	Uncharacterized protein	-	< 70 %
		22	ENSRNA050022806	U1 spliceosomal RNA	-	-
QLr.ipbb-6A.5	Tdurum_contig10412_650	1	TraesCS6A02G111000	Lipase_GDSL domain-containing protein	-	-
		2	TraesCS6A02G111100	Protein phosphatase	-	-
		3	TraesCS6A02G111200	ABC1 domain-containing protein	-	-
		4	TraesCS6A02G111300	Uncharacterized protein	Uncharacterized protein (A. tauschii)	82.76
		5	TraesCS6A02G111400	Terpene cyclase/mutase family member	-	-
		6	TraesCS6A02G111500	Uncharacterized protein	CRS2-associated factor 2, mitochondrial (A. tauschii)	89.62
		7	TraesCS6A02G111600	TMEM189_B_dmain domain-containing protein	-	-
		8	TraesCS6A02G111700	Uncharacterized protein	Uncharacterized protein (T. turgidum)	93.9
		9	TraesCS6A02G111800	Gamma-tubulin complex component	-	-
		10	TraesCS6A02G111900	Auxin-responsive protein	-	-
		11	TraesCS6A02G112000	Auxin-responsive protein	-	-
		12	TraesCS6A02G112100	Uncharacterized protein	Mitochondrial import inner membrane translocase subunit TIM22	100
		13	TraesCS6A02G112200	Uncharacterized protein	Cucumisin / Subtilisin-like protease (A. tauschii)	94.44
		14	TraesCS6A02G112300	F-box domain-containing protein	-	-
QLr.ipbb-7A.3	wsnp_Ex_c5608_9867710	1	TraesCS7A02G439400	Germin-like protein	-	-
		2	TraesCS7A02G439500	Germin-like protein	-	-
		3	TraesCS7A02G439600	Germin-like protein	-	-
		4	TraesCS7A02G439700	Uncharacterized protein	Uncharacterized protein (H. vulgare)	77.36
		5	TraesCS7A02G439800	Uncharacterized protein	Uncharacterized protein (T. turgidum)	100
		6	TraesCS7A02G439900	Fe2OG dioxygenase domain-containing protein	-	-
		7	TraesCS7A02G440000	Uncharacterized protein	Uncharacterized protein (T. turgidum)	99.67
		8	TraesCS7A02G440100	Uncharacterized protein	Uncharacterized protein (T. turgidum)	99.55
		9	TraesCS7A02G440200	Uncharacterized protein	Disease resistance protein RPP13 (A. tauschii)	90.52
		10	TraesCS7A02G440300	Uncharacterized protein	Uncharacterized protein (T. turgidum)	89.60
		11	TraesCS7A02G440400	Fe2OG dioxygenase domain-containing protein	-	-
		12	TraesCS7A02G440500	Uncharacterized protein	Uncharacterized protein (T. turgidum)	100
		13	TraesCS7A02G440600	Uncharacterized protein	Uncharacterized protein (T. turgidum)	100
		14	TraesCS7A02G440700	FBA_1 domain-containing protein	-	-
		15	TraesCS7A02G440800	F-box domain-containing protein	-	-
		16	TraesCS7A02G441000	Uncharacterized protein	Uncharacterized protein (T. turgidum)	100
		17	TraesCS7A02G441100	FBA_3 domain-containing protein	-	-
		18	TraesCS7A02G441200	Uncharacterized protein	Speckle-type POZ protein-like protein (A. tauschii)	88.37
		19	TraesCS7A02G441300	DUF4220 domain-containing protein	-	-
QLr.ipbb-7B.3	TA002394-1002	1	TraesCS7B02G418900	Uncharacterized protein	FAD-binding PCMH-type domain-containing protein (B. distachyon)	73.7
		2	TraesCS7B02G419000	Uncharacterized protein	FAD-binding PCMH-type domain-containing protein (B. distachyon)	79.44
		3	TraesCS7B02G419100	Uncharacterized protein	-	< 70 %
		4	TraesCS7B02G419200	Uncharacterized protein	-	< 70 %
		5	TraesCS7B02G419300	RRM_8 domain-containing protein	-	-
		6	TraesCS7B02G419400	WRKY domain-containing protein	-	-
QLr.ipbb-7D.1	Excalibur_c4799_338	1	TraesCS7D02G431200	RING-type domain-containing protein	-	-
		2	TraesCS7D02G431300	RING-type domain-containing protein	-	-
		3	TraesCS7D02G431400	Uncharacterized protein	-	-
		4	TraesCS7D02G431500	Glutathione synthetase	-	-
		5	TraesCS7D02G431600	Uncharacterized protein	Uncharacterized protein (T. urartu)	93.4
		6	TraesCS7D02G431700	SAWADEE domain-containing protein	-	-

## Sheet: SR
Table S1: The list of protein- and RNA-coding genes in 500 kb upstream and 500 kb downstream from the most significant SNP of the QTL. Genes and proteins overlapping with the peak SNP are highlighted in bold.
QTL	Peak marker	#	Genes	Protein of T. aestivum	Protein of orthologue	% genes of T. aestivum matching the sequence of orthologue
QSr.ipbb-1B.4	Kukri_c36151_170	1	TraesCS1B02G019100	Uncharacterized protein	Ras-related protein RABD1 (A. tauschii)	85.37
		2	TraesCS1B02G019200	CAP-Gly domain-containing protein	-	-
		3	TraesCS1B02G019300	Uncharacterized protein	Uncharacterized protein (T turgidum)	100
		4	TraesCS1B02G019400	GST C-terminal domain-containing protein	-	-
		5	TraesCS1B02G019500	Receptor-like serine/threonine-protein kinase	-	-
		6	TraesCS1B02G019600	Oxidored_FMN domain-containing protein	-	-
		7	TraesCS1B02G019700	Oxidored_FMN domain-containing protein	-	-
		8	TraesCS1B02G019800	Oxidored_FMN domain-containing protein	-	-
		9	TraesCS1B02G019900	Bulb-type lectin domain-containing protein	-	-
		10	TraesCS1B02G020000	Pept_C1 domain-containing protein	-	-
		11	TraesCS1B02G020100	F-box domain-containing protein	-	-
		12	TraesCS1B02G020200	Protein kinase domain-containing protein	-	-
		13	TraesCS1B02G020300	Uncharacterized protein	Disease resistance protein RPM1 (A. tauschii)	90.28
		14	TraesCS1B02G020400	Uncharacterized protein	Disease resistance protein RPM1 (A. tauschii)	94.95
		15	TraesCS1B02G020500	Nontranslating CDS	-	-
		16	TraesCS1B02G020600	Resistance-related receptor-like kinase	-	-
		17	TraesCS1B02G020700	Resistance-related receptor-like kinase	-	-
		18	TraesCS1B02G020800	DUF4220 domain-containing protein	-	-
		19	TraesCS1B02G020900	Uncharacterized protein	Disease resistance protein RPM1 (A. tauschii)	79.47
		20	TraesCS1B02G021000	Uncharacterized protein	O-methyltransferase ZRP4 (A. tauschii)	90.3
		21	TraesCS1B02G021100	Uncharacterized protein	GST N-terminal domain-containing protein (H. vulgare)	87.45
		22	TraesCS1B02G021200	RRM domain-containing protein	-	-
		23	TraesCS1B02G021300	Phosphatidate cytidylyltransferase	-	-
		24	TraesCS1B02G021400	Uncharacterized protein	GST N-terminal domain-containing protein (H. vulgare)	76.27
		25	TraesCS1B02G021500	Uncharacterized protein	Uncharacterized protein (T. turgidum)	76.04
		26	TraesCS1B02G021600	Nontranslating CDS	-	-
		27	TraesCS1B02G021700	Uncharacterized protein	Uncharacterized protein (T. urartu)	70.18
		28	TraesCS1B02G021800	Uncharacterized protein	-	< 70 %
		29	TraesCS1B02G021900	Uncharacterized protein	Uncharacterized protein (T. turgidum)	99.34
QSr.ipbb-1D.1	BS00074817_51	1	TraesCS1D02G070700	Uncharacterized protein	Uncharacterized protein (T. urartu)	100
		2	TraesCS1D02G070800	Uncharacterized protein	Photosystem II reaction center protein M (psbM) (H. vulgare)	94.12
		3	TraesCS1D02G070900	Uncharacterized protein	Uncharacterized protein (B. distachyon)	90.7
		4	TraesCS1D02G071000	Photosystem II reaction center protein Z (psbZ)	-	-
		5	TraesCS1D02G071100	Photosystem II reaction center protein I (psbI)	-	-
		6	TraesCS1D02G071200	Uncharacterized protein	Photosystem II reaction center protein K (psbK) (T. turgidum)	98.44
		7	TraesCS1D02G071300	Maturase K	-	-
		8	TraesCS1D02G071400	Uncharacterized protein	Photosystem II protein D1 (psbA) (H. vulgare)	94.01
		9	TraesCS1D02G071500	Uncharacterized protein	-	-
		10	TraesCS1D02G071600	Uncharacterized protein	-	-
		11	TraesCS1D02G071700	Uncharacterized protein	Uncharacterized protein (B. distachyon)	76.12
		12	TraesCS1D02G071800	Phosphoinositide phospholipase C	-	-
		13	TraesCS1D02G071900	F-box domain-containing protein	-	-
		14	TraesCS1D02G072000	Uncharacterized protein	ADP-ribosylation factor-related protein 1 (A. tauschii)	100
		15	TraesCS1D02G072100	VARLMGL domain-containing protein	-	-
		16	TraesCS1D02G072200	Uncharacterized protein	Zinc finger CCCH domain-containing protein 33 (A. tauschii)	100
		17	TraesCS1D02G072300	Uncharacterized protein	Uncharacterized protein (A. tauschii)	95.18
		18	TraesCS1D02G072400	Uncharacterized protein	Uncharacterized protein (T. turgidum)	83.08
		19	TraesCS1D02G072500	Uncharacterized protein	Uncharacterized protein (A. tauschii)	100
		20	ENSRNA050023842	IsrR (Antisense RNA)	-	-
		21	ENSRNA050023843	LSU rRNA eukarya	-	-
		22	ENSRNA050023844	LSU rRNA eukarya	-	-
QSr.ipbb-2A.2	RAC875_rep_c88665_100	1	TraesCS2A02G047700	Uncharacterized protein	-	< 70 %
		2	TraesCS2A02G047800	Protein kinase domain-containing protein	-	-
		3	TraesCS2A02G047900	Uncharacterized protein	Uncharacterized protein (A. tauschii)	97.47
		4	TraesCS2A02G048000	Uncharacterized protein	Uncharacterized protein (A. tauschii)	89.66
		5	TraesCS2A02G048100	Uncharacterized protein	Uncharacterized protein (T. turgidum)	81.19
		6	TraesCS2A02G048300	Uncharacterized protein	Uncharacterized protein (H. vulgare)	86.21
		7	TraesCS2A02G048400	Uncharacterized protein	Uncharacterized protein (A. tauschii)	75.7
		8	TraesCS2A02G048500	Uncharacterized protein	Uncharacterized protein (A. tauschii)	92.86
		9	TraesCS2A02G048600	Methyltransf_11 domain-containing protein	-	-
		10	TraesCS2A02G048700	Uncharacterized protein	-	< 70 %
		11	TraesCS2A02G048800	Uncharacterized protein	Uncharacterized protein (A. tauschii)	97.26
		12	TraesCS2A02G048900	Knot1 domain-containing protein	-	-
		13	TraesCS2A02G049000	Knot1 domain-containing protein	-	-
		14	TraesCS2A02G049100	Uncharacterized protein	Uncharacterized protein (A. tauschii)	93.75
		15	TraesCS2A02G049200	Uncharacterized protein	Uncharacterized protein (A. tauschii)	97.14
		16	TraesCS2A02G049300	Uncharacterized protein	Uncharacterized protein (A. tauschii)	90.48
		17	TraesCS2A02G049400	Uncharacterized protein	Putative disease resistance RPP13-like protein 1 (A. tauschii)	81.59
		18	TraesCS2A02G049500	Uncharacterized protein	(+)-delta-cadinene synthase isozyme (A. tauschii)	91.28
		19	TraesCS2A02G049700	ABC transporter domain-containing protein	-	-
		20	TraesCS2A02G049800	F-box domain-containing protein	-	-
		21	TraesCS2A02G049900	Nicotianamine synthase (NAS3-A)	-	-
		22	TraesCS2A02G050000	DUF295 domain-containing protein	-	-
		23	TraesCS2A02G050100	PMEI domain-containing protein	-	-
		24	TraesCS2A02G050200	F-box domain-containing protein	-	-
		25	TraesCS2A02G050300	Sulfotransferase	-	-
		26	TraesCS2A02G050400	Uncharacterized protein	Uncharacterized protein (A. tauschii)	83.73
		27	ENSRNA050010647	tRNA-Thr
QSr.ipbb-2B.3	Kukri_c30847_551	1	TraesCS2B02G006600	Uncharacterized protein	Eceriferum-u (H. vulgare)	91.67
		2	TraesCS2B02G006700	Uncharacterized protein	Eceriferum-c (H. vulgare)	93.65
		3	TraesCS2B02G006800	Uncharacterized protein	Eceriferum-c (H. vulgare)	93.28
		4	TraesCS2B02G006900	Uncharacterized protein	Uncharacterized protein (T. dicoccoides)	81.04
		5	TraesCS2B02G007000	Uncharacterized protein	Uncharacterized protein (H. vulgare)	87.5
		6	TraesCS2B02G007100	Abhydrolase_3 domain-containing protein	-	-
		7	TraesCS2B02G007200	Uncharacterized protein	DUF1298 domain-containing protein (H. vulgare)	87.23
		8	TraesCS2B02G007300	ANK_REP_REGION domain-containing protein	-	-
		9	TraesCS2B02G007400	Lectin_legB domain-containing protein	-	-
		10	TraesCS2B02G007500	Uncharacterized protein	Putative disease resistance protein RPM1 (T. turgidum)	99.35
		11	TraesCS2B02G007600	Uncharacterized protein	Putative disease resistance protein RPM1 (T. turgidum)	99.54
		12	TraesCS2B02G007700	LIM zinc-binding domain-containing protein	-	-
		13	TraesCS2B02G007800	Uncharacterized protein	Uncharacterized protein (T. turgidum)	91.56
		14	TraesCS2B02G007900	Uncharacterized protein	Uncharacterized protein (T. turgidum)	97.9
		15	TraesCS2B02G008000	Uncharacterized protein	Uncharacterized protein (T. turgidum)	97.06
		16	TraesCS2B02G008100	Uncharacterized protein	Uncharacterized protein (T. turgidum)	99.31
		17	TraesCS2B02G008200	zf-GRF domain-containing protein	-	-
		18	TraesCS2B02G008300	Receptor-like serine/threonine-protein kinase	-	-
		19	TraesCS2B02G008400	Protein kinase domain-containing protein	-	-
		20	TraesCS2B02G008500	ANK_REP_REGION domain-containing protein	-	-
		21	TraesCS2B02G008600	RNase H domain-containing protein	-	-
		22	TraesCS2B02G008700	Protein kinase domain-containing protein	-	-
		23	TraesCS2B02G008800	Uncharacterized protein	-	< 70 %
		24	TraesCS2B02G008900	Uncharacterized protein	Protein transport Sec24-like protein (A. tauschii)	97.32
		25	TraesCS2B02G009000	Uncharacterized protein	-	-
		26	TraesCS2B02G009100	Uncharacterized protein	Uncharacterized protein (T. turgidum)	97.83
		27	TraesCS2B02G009200	Uncharacterized protein	-	-
QSr.ipbb-2B.4	TA001322-1176	1	TraesCS2B02G201900	Uncharacterized protein	Cytochrome P450 78A4 (A. tauschii)	87.81
		2	TraesCS2B02G202000	AB hydrolase-1 domain-containing protein	-	-
		3	TraesCS2B02G202100	TF-B3 domain-containing protein	-	-
		4	TraesCS2B02G202200	Uncharacterized protein	Uncharacterized protein (T. turgidum)	99.84
		5	TraesCS2B02G202300	DUF4378 domain-containing protein	-	-
QSr.ipbb-2D.2	wsnp_Ex_rep_c80588_75758453	1	TraesCS2D02G016700	Laccase	-	-
		2	TraesCS2D02G016800	Laccase	-	-
		3	TraesCS2D02G016900	LIM zinc-binding domain-containing protein	-	-
		4	TraesCS2D02G017000	Uncharacterized protein	Uncharacterized protein (A. tauschii)	99.85
		5	TraesCS2D02G017100	Uncharacterized protein	Uncharacterized protein (A. tauschii)	100
		6	TraesCS2D02G017200	Uncharacterized protein	Uncharacterized protein (A. tauschii)	100
		7	TraesCS2D02G017300	Uncharacterized protein	Uncharacterized protein (A. tauschii)	100
		8	TraesCS2D02G017400	Receptor-like serine/threonine-protein kinase	-	-
		9	TraesCS2D02G017500	Protein kinase domain-containing protein	-	-
		10	TraesCS2D02G017600	Protein kinase domain-containing protein	-	-
		11	TraesCS2D02G017700	Rx_N domain-containing protein	-	-
		12	TraesCS2D02G017800	Uncharacterized protein	Uncharacterized protein (T. turgidum)	90.83
		13	TraesCS2D02G017900	Uncharacterized protein	Uncharacterized protein (A. tauschii)	99.44
		14	TraesCS2D02G018000	Pectate lyase	-	-
		15	TraesCS2D02G018100	Rx_N domain-containing protein	-	-
		16	TraesCS2D02G018200	Rx_N domain-containing protein	-	-
		17	TraesCS2D02G018300	Rx_N domain-containing protein	-	-
		18	TraesCS2D02G018400	Rx_N domain-containing protein	-	-
		19	TraesCS2D02G018500	Uncharacterized protein	-	< 70 %
		20	TraesCS2D02G018600	DUF1618 domain-containing protein	-	-
		21	TraesCS2D02G018700	Ubiquitin-like domain-containing protein	-	-
		22	TraesCS2D02G018800	DUF1618 domain-containing protein	-	-
		23	TraesCS2D02G019000	FBD domain-containing protein	-	-
		24	TraesCS2D02G019100	DUF1618 domain-containing protein	-	-
		25	TraesCS2D02G019200	Uncharacterized protein	Putative disease resistance RPP13-like protein (T. turgidum)	95.02
		26	TraesCS2D02G019300	TCP domain-containing protein	-	-
QSr.ipbb-3D.1	Kukri_c42075_156	1	TraesCS3D02G110700	Malic enzyme	-	-
		2	TraesCS3D02G110800	Uncharacterized protein	Uncharacterized protein (T. turgidum)	96.87
		3	TraesCS3D02G110900	Uncharacterized protein	F-box domain-containing protein (A. tauschii)	94.17
		4	TraesCS3D02G111000	Fe2OG dioxygenase domain-containing protein	-	-
		5	TraesCS3D02G111100	Uncharacterized protein	Myb-like protein J (A. tauschii)	95.51
		6	TraesCS3D02G111200	Uncharacterized protein	Uncharacterized protein (T. turgidum)	93.22
		7	TraesCS3D02G111300	Cytokinin oxidase (ckx)	-	-
		8	TraesCS3D02G111400	WD_REPEATS_REGION domain-containing protein	-	-
		9	TraesCS3D02G111500	Uncharacterized protein	RNase H domain-containing protein (A. tauschii)	97.99
QSr.ipbb-5A.2	wsnp_Ku_c18023_27232712	1	TraesCS5A02G507400	Uncharacterized protein	Uncharacterized protein (T. turgidum)	80.58
		2	TraesCS5A02G507500	Uncharacterized protein	-	< 70 %
		3	TraesCS5A02G507600	Uncharacterized protein	Cas1_AcylT domain-containing protein (A. tauschii)	95.57
		4	TraesCS5A02G507700	F-box domain-containing protein	-	-
		5	TraesCS5A02G507800	ULP_PROTEASE domain-containing protein	-	-
		6	TraesCS5A02G507900	Uncharacterized protein	Uncharacterized protein (A. tauschii)	97.38
		7	TraesCS5A02G508000	Uncharacterized protein	Uncharacterized protein (A. tauschii)	94.44
		8	TraesCS5A02G508100	Uncharacterized protein	Uncharacterized protein (A. tauschii)	74.09
		9	TraesCS5A02G508200	DNA-directed RNA polymerase subunit beta (rpoB)	-	-
		10	TraesCS5A02G508300	Myb_DNA-bind_3 domain-containing protein	-	-
		11	TraesCS5A02G508400	Uncharacterized protein	Uncharacterized protein (T. turgidum)	96.07
		12	TraesCS5A02G508500	Uncharacterized protein	Peptide transporter PTR3-A	97.2
		13	ENSRNA050011247	tRNA-Gly	-	-
QSr.ipbb-5A.3	CAP7_c4064_162	1	TraesCS5A02G530900	Uncharacterized protein	-	< 70 %
		2	TraesCS5A02G531000	Uncharacterized protein	Uncharacterized protein (T. urartu)	92.96
		3	TraesCS5A02G531100	Uncharacterized protein	Uncharacterized protein (T. turgidum)	100
		4	TraesCS5A02G531200	Branched-chain-amino-acid aminotransferase	-	-
		5	TraesCS5A02G531300	Fatty acyl-CoA reductase	-	-
		6	TraesCS5A02G531400	E3 ubiquitin-protein ligase	-	-
		7	TraesCS5A02G531500	Alkyl transferase	-	-
		8	TraesCS5A02G531600	Uncharacterized protein	zf-RVT domain-containing protein (A. tauschii)	70.95
		9	TraesCS5A02G531700	DUF4378 domain-containing protein	-	-
		10	TraesCS5A02G531800	Uncharacterized protein	Uncharacterized protein (T. dicoccoides)	99.55
		11	TraesCS5A02G531900	Uncharacterized protein	Uncharacterized protein (T. turgidum)	100
		12	TraesCS5A02G532000	Uncharacterized protein	Nucleoside-triphosphatase (A. tauschii)	96.75
		13	TraesCS5A02G532100	Uncharacterized protein	Uncharacterized protein (B. distachyon)	78.8
		14	TraesCS5A02G532200	Uncharacterized protein	Stem 28 kDa glycoprotein (T. urartu)	95.62
		15	TraesCS5A02G532300	Uncharacterized protein	Uncharacterized protein (T. turgidum)	97.45
		16	TraesCS5A02G532400	Uncharacterized protein	Uncharacterized protein (T. turgidum)	95.91
		17	TraesCS5A02G532500	Med12 domain-containing protein	-	-
		18	TraesCS5A02G532600	Uncharacterized protein	Uncharacterized protein (T. turgidum)	99.28
		19	TraesCS5A02G532700	Uncharacterized protein	Uncharacterized protein (T. turgidum)	100
		20	TraesCS5A02G532800	FBD domain-containing protein	-	-
		21	TraesCS5A02G532900	Uncharacterized protein	Glycosyltransferase (A. tauschii)	87.13
		22	TraesCS5A02G533000	Tify domain-containing protein	-	-
QSr.ipbb-5B.1	RFL_Contig2772_1693	1	TraesCS5B02G429500	Uncharacterized protein	Putative glutamate carboxypeptidase 2 (A. tauschii)	97.05
		2	TraesCS5B02G429600	Uncharacterized protein	Putative aldehyde oxidase 2 (T. urartu)	80.34
		3	TraesCS5B02G429700	Uncharacterized protein	Uncharacterized protein (T. dicoccoides)	98.66
		4	TraesCS5B02G429800	Uncharacterized protein	Uncharacterized protein (T. dicoccoides)	97.02
		5	TraesCS5B02G429900	Uncharacterized protein	Uncharacterized protein (T. turgidum)	99.7
		6	TraesCS5B02G430000	Uncharacterized protein	Uncharacterized protein (T. turgidum)	100
		7	TraesCS5B02G430100	Uncharacterized protein	Putative aldehyde oxidase (A. tauschii)	97.58
		8	TraesCS5B02G430200	Uncharacterized protein	Zinc finger A20 and AN1 domain-containing stress-associated protein 7	90.73
		9	TraesCS5B02G430300	Uncharacterized protein	Uncharacterized protein (T. dicoccoides)	100
		10	TraesCS5B02G430400	Phytocyanin domain-containing protein	-	-
		11	TraesCS5B02G430500	Phytocyanin domain-containing protein	-	-
		12	TraesCS5B02G430600	Phytocyanin domain-containing protein	-	-
		13	TraesCS5B02G430700	Uncharacterized protein	Uncharacterized protein (A. tauschii)	96.4
		14	TraesCS5B02G430800	Uncharacterized protein	25.3 kDa vesicle transport protein (A. tauschii)	100
		15	TraesCS5B02G431000	Protein kinase domain-containing protein	-	-
		16	TraesCS5B02G431100	Ubiquitin-conjugating enzyme E2 2 (UBC2)	-	-
QSr.ipbb-6B.5	CAP11_c7959_386	1	TraesCS6B02G024500	DUF5637 domain-containing protein	-	-
		2	TraesCS6B02G024600	DUF5637 domain-containing protein	-	-
		3	TraesCS6B02G024700	Uncharacterized protein	Uncharacterized protein (T. turgidum)	99.4
		4	TraesCS6B02G024800	Uncharacterized protein	Uncharacterized protein (T. turgidum)	100
		5	TraesCS6B02G024900	Nitrate reductase	-	-
		6	TraesCS6B02G025000	Uncharacterized protein	Uncharacterized protein (T. turgidum)	100
		7	TraesCS6B02G025100	Uncharacterized protein	-	< 70 %
		8	TraesCS6B02G025200	Uncharacterized protein	Uncharacterized protein (T. urartu)	74.08
		9	TraesCS6B02G025300	Uncharacterized protein	Uncharacterized protein (T. dicoccoides)	99.35
		10	TraesCS6B02G025400	Protein kinase domain-containing protein	-	-
		11	TraesCS6B02G025500	Uncharacterized protein	Uncharacterized protein (T. turgidum)	99.11
		12	TraesCS6B02G025600	Uncharacterized protein	-	< 70 %
QSr.ipbb-6B.6	Kukri_c3044_221	1	TraesCS6B02G131300	Uncharacterized protein	-	-
		2	TraesCS6B02G131400	MatR	-	-
		3	TraesCS6B02G131500	Uncharacterized protein	CcmF_C domain-containing protein	89.09
		4	TraesCS6B02G131600	Uncharacterized protein	Uncharacterized protein (T. turgidum)	99.14
		5	TraesCS6B02G131700	Uncharacterized protein	-	< 70 %
		6	TraesCS6B02G131800	Uncharacterized protein	CcmF_C domain-containing protein	92.38
		7	TraesCS6B02G131900	Uncharacterized protein	Uncharacterized protein (T. turgidum)	99.44
		8	TraesCS6B02G132000	Uncharacterized protein	-	< 70 %
QSr.ipbb-6B.7	CAP7_c3697_87	1	TraesCS6B02G398900	Uncharacterized protein	Uncharacterized protein (T. turgidum)	80.74
		2	TraesCS6B02G399000	Shugoshin_C domain-containing protein	-	-
		3	TraesCS6B02G399100	Uncharacterized protein	Uncharacterized protein (T. turgidum)	99.06
		4	TraesCS6B02G399200	Uncharacterized protein	Uncharacterized protein (T. turgidum)	97.35
		5	TraesCS6B02G399300	Uncharacterized protein	-	< 70 %
		6	TraesCS6B02G399400	Uncharacterized protein	Uncharacterized protein (A. tauschii)	92.05
		7	TraesCS6B02G399500	Cytochrome b5 heme-binding domain-containing protein	-	-
		8	TraesCS6B02G399600	Uncharacterized protein	Uncharacterized protein (T. turgidum)	99.04
		9	TraesCS6B02G399700	Uncharacterized protein	Uncharacterized protein (A. tauschii)	86.41
		10	TraesCS6B02G399800	Uncharacterized protein	Uncharacterized protein (T. turgidum)	99.38
